# Supplementary material for: Incremental costs of fragility fractures: a population-based matched -cohort study from Ontario, Canada
Source: Springer Nature journal article supplement (doi:10.1007/s00198-021-05877-8), 2021-02-18
Supplement: MOESM1 [file 18878812]

# **Online Resources File – Incremental costs of fragility fractures: a population-based matched-cohort study from Ontario, Canada**

## **Table of Contents**

|                                                                                                                                                                                       |    |
|---------------------------------------------------------------------------------------------------------------------------------------------------------------------------------------|----|
| Online Resource Table 1 Diagnosis codes for fragility fractures and trauma codes .....                                                                                                | 2  |
| Online Resource Table 2 ICES Health Services Datasets .....                                                                                                                           | 3  |
| Online Resource Table 3 Mean $\pm$ standard deviation (SD) annual cost per patient up to 5 years after index fracture, by site of fracture and healthcare resource use category ..... | 6  |
| <br>                                                                                                                                                                                  |    |
| Online Resource Fig. 1 Study design.....                                                                                                                                              | 10 |
| Online Resource Fig. 2 Flow diagram of patients included in the different cohorts .....                                                                                               | 11 |
| Online Resource Fig. 3 Number of index fragility fractures per year (2011-2015*), by site of fracture and year of fracture (full fracture cohort) .....                               | 12 |
| Online Resource Fig. 4 Mean annual cost per patient in 1 <sup>st</sup> year post fracture, by age group (full fracture cohort).....                                                   | 13 |
| Online Resource Fig. 5 Mean annual cost per patient in 1 <sup>st</sup> year post fracture, by number of comorbidities* (full fracture cohort) .....                                   | 14 |

**Online Resource Table 1 Diagnosis codes for fragility fractures and trauma codes**

| <b>Category</b>                          | <b>ICD-10 Code</b>                                                      |
|------------------------------------------|-------------------------------------------------------------------------|
| Fracture site                            |                                                                         |
| Hip                                      | S72.0, S72.1, S72.2                                                     |
| Radius and Ulna                          | S52.0, S52.1, S52.2, S52.3, S52.4, S52.7, S52.8, S52.9                  |
| Wrist                                    | S52.5, S52.6                                                            |
| Humerus/ Shoulder                        | S42.2, S42.3, S42.4, S42.8, S42.9                                       |
| Vertebral                                | S22.0, S22.1, S32.0                                                     |
| Femur                                    | S72.3, S72.4, S72.7, S72.8, S72.9                                       |
| Other (tibia, fibula, knee)              | S82.0, S82.1, S82.2, S82.3, S82.4, S82.5, S82.6                         |
| Sternum, Clavicle and Ribs               | S22.2, S22.3, S22.4, S42.0                                              |
| Pelvis                                   | S32.1, S32.2, S32.3, S32.4, S32.5, S32.7, S32.8                         |
| Multiple sites                           | S42.7, T02.1, T02.2, T02.3, T02.4, T02.5, T02.6, T02.7,<br>T02.8, T02.9 |
| Trauma                                   |                                                                         |
| Accidents                                | V01-V99, X00-X58, X59.9, W20-W99                                        |
| Injuries involving multiple body regions | T00-T01, T03-T07                                                        |
| Falls                                    | W02-W04, W09, W11-W17                                                   |

**Online Resource Table 2 ICES Health Services Datasets**

| Dataset                                 | Description                                                                                                                                                                                                                                                                                                                                                                                                                                                                                                                                                                                                                                           |
|-----------------------------------------|-------------------------------------------------------------------------------------------------------------------------------------------------------------------------------------------------------------------------------------------------------------------------------------------------------------------------------------------------------------------------------------------------------------------------------------------------------------------------------------------------------------------------------------------------------------------------------------------------------------------------------------------------------|
| CCRS - Continuing Care Reporting System | The CCRS database is compiled by the Canadian Institute for Health Information and contains demographic, clinical, functional, and resource utilization information for individuals receiving facility-based continuing care (also known as extended, auxiliary, or complex chronic care) in Ontario hospitals and residential care providing 24 hour nursing services (i.e. nursing home). Clinical assessment data (on the physical, functional, cognitive, and social domains of health) is ascertained using the Resident Assessment Instrument Minimum Data Set (RAI-MDS) version 2.0 which is administered by trained healthcare professionals. |
| CIHI DAD - Discharge Abstract Database  | The DAD is compiled by the Canadian Institute for Health Information and contains administrative, clinical (diagnoses and procedures/interventions), demographic, and administrative information for all admissions to acute care hospitals, rehab, chronic, and day surgery institutions in Ontario. At ICES, consecutive DAD records are linked together to form ‘episodes of care’ among the hospitals to which patients have been transferred after their initial admission.                                                                                                                                                                      |
| CIHI SDS - Same Day Surgery Database    | The SDS is compiled by the Canadian Institute for Health Information and contains administrative, clinical (diagnoses and procedures), demographic, and administrative information for all patient visits made to day surgery institutions in Ontario. The main data elements include patient demographics, clinical data (diagnoses, procedures, physician), administrative data (institution/hospital number etc.), financial data, service-specific data elements for day surgery and emergency.                                                                                                                                                   |
| HCDMOH - Home Care Database             | The Home Care Database is maintained by Health Shared Services Ontario and is a clinical, client-centered database that captures all home care services provided or coordinated by Local Health                                                                                                                                                                                                                                                                                                                                                                                                                                                       |

|                                                      |                                                                                                                                                                                                                                                                                                                                                                                                                                                                                                                                             |
|------------------------------------------------------|---------------------------------------------------------------------------------------------------------------------------------------------------------------------------------------------------------------------------------------------------------------------------------------------------------------------------------------------------------------------------------------------------------------------------------------------------------------------------------------------------------------------------------------------|
|                                                      | Integration Networks. This dataset contains information on client, intake, assessment, admission, diagnostic and surgical procedure, and service delivery.                                                                                                                                                                                                                                                                                                                                                                                  |
| NACRS - National Ambulatory Care Reporting System    | The NACRS is compiled by the Canadian Institute for Health Information and contains administrative, clinical (diagnoses and procedures), demographic, and administrative information for all patient visits made to hospital- and community-based ambulatory care centres (emergency departments, day surgery units, hemodialysis units, and cancer care clinics). At ICES, NACRS records are linked with other data sources (DAD, OMHRS) to identify transitions to other care settings, such as inpatient acute care or psychiatric care. |
| NRS - National Rehabilitation Reporting System       | The NRS is compiled by the Canadian Institute for Health Information and contains client data collected from participating adult inpatient rehabilitation facilities and programs across Canada. Main data elements contain socio-demographic information, administrative data (e.g. referral, admission and discharge), health characteristics, activities and participation (e.g. ADL, communication, social interaction), and interventions.                                                                                             |
| ODB - Ontario Drug Benefit Claims                    | The ODB database contains prescription medication claims for those covered under the provincial drug program, mainly: those aged 65 years and older, nursing home residents, patients receiving services under the Ontario Home Care program, those receiving social assistance, and residents eligible for specialized drug programs. Main data elements include drug identifier, quantity, # days supplied, date dispensed, cost, and patient, pharmacy and physician identifiers.                                                        |
| OHIP - Ontario Health Insurance Plan Claims Database | The OHIP claims database contains information on inpatient and outpatient services provided to Ontario residents eligible for the province’s publicly funded health insurance system by fee-for-service health care practitioners (primarily physicians) and “shadow                                                                                                                                                                                                                                                                        |

|  |                                                                                                                                                                                                                                          |
|--|------------------------------------------------------------------------------------------------------------------------------------------------------------------------------------------------------------------------------------------|
|  | <p>billings” for those paid through non-fee-for-service payment plans. The main data elements include patient and physician identifiers (encrypted), code for service provided, date of service, associated diagnosis, and fee paid.</p> |
|--|------------------------------------------------------------------------------------------------------------------------------------------------------------------------------------------------------------------------------------------|

**Online Resource Table 3 Mean  $\pm$  standard deviation (SD) annual cost per patient up to 5 years after index fracture, by site of fracture and healthcare resource use category**

|                                 | <b>Year 1</b>                         | <b>Year 2</b>                         | <b>Year 3</b>                         | <b>Year 4</b>                         | <b>Year 5</b>                         | <b>Total Costs</b>                     |
|---------------------------------|---------------------------------------|---------------------------------------|---------------------------------------|---------------------------------------|---------------------------------------|----------------------------------------|
|                                 | <b>Mean <math>\pm</math> SD</b>        |
| <b>Hip</b>                      | <b>N=31,613</b>                       | <b>N=31,613</b>                       | <b>N=23,943</b>                       | <b>N=16,106</b>                       | <b>N=8,872</b>                        | <b>N=31,613</b>                        |
| CCRS, home care, LTC            | 20,037 $\pm$ 28,664                   | 11,952 $\pm$ 21,935                   | 10,221 $\pm$ 20,010                   | 8,367 $\pm$ 18,054                    | 6,929 $\pm$ 16,715                    | 45,938 $\pm$ 67,816                    |
| Hospitalization                 | 24,625 $\pm$ 26,312                   | 3,869 $\pm$ 13,989                    | 3,155 $\pm$ 11,379                    | 2,551 $\pm$ 10,584                    | 2,127 $\pm$ 9,614                     | 32,780 $\pm$ 35,761                    |
| Inpatient rehabilitation        | 6,922 $\pm$ 10,700                    | 432 $\pm$ 3,277                       | 403 $\pm$ 3,271                       | 307 $\pm$ 2,885                       | 276 $\pm$ 3,360                       | 7,893 $\pm$ 12,749                     |
| Prescription drugs              | 2,194 $\pm$ 3,503                     | 1,945 $\pm$ 3,757                     | 1,643 $\pm$ 3,434                     | 1,326 $\pm$ 2,880                     | 1,056 $\pm$ 2,385                     | 6,355 $\pm$ 10,350                     |
| Other health care services*     | 9,015 $\pm$ 5,289                     | 2,404 $\pm$ 3,769                     | 2,004 $\pm$ 3,508                     | 1,599 $\pm$ 3,118                     | 1,318 $\pm$ 2,833                     | 14,123 $\pm$ 10,098                    |
| <b>All health care services</b> | <b>62,793 <math>\pm</math> 44,438</b> | <b>20,602 <math>\pm</math> 30,650</b> | <b>17,426 <math>\pm</math> 27,974</b> | <b>14,150 <math>\pm</math> 25,631</b> | <b>11,707 <math>\pm</math> 23,763</b> | <b>107,088 <math>\pm</math> 89,833</b> |
| <b>Humerus</b>                  | <b>N=13,237</b>                       | <b>N=13,237</b>                       | <b>N=10,062</b>                       | <b>N=6,657</b>                        | <b>N=3,703</b>                        | <b>N=13,237</b>                        |
| CCRS, home care, LTC            | 9,766 $\pm$ 20,256                    | 6,887 $\pm$ 17,018                    | 6,475 $\pm$ 16,079                    | 6,328 $\pm$ 16,550                    | 5,844 $\pm$ 14,890                    | 26,392 $\pm$ 52,402                    |
| Hospitalization                 | 9,328 $\pm$ 20,568                    | 3,904 $\pm$ 13,199                    | 3,732 $\pm$ 15,212                    | 3,493 $\pm$ 15,149                    | 3,056 $\pm$ 14,984                    | 18,679 $\pm$ 34,968                    |
| Inpatient rehabilitation        | 1,090 $\pm$ 5,374                     | 492 $\pm$ 3,715                       | 455 $\pm$ 3,507                       | 379 $\pm$ 3,079                       | 333 $\pm$ 2,778                       | 2,211 $\pm$ 8,140                      |
| Prescription drugs              | 2,054 $\pm$ 3,203                     | 1,957 $\pm$ 3,618                     | 1,859 $\pm$ 3,793                     | 1,737 $\pm$ 4,004                     | 1,520 $\pm$ 3,310                     | 6,723 $\pm$ 11,039                     |
| Other health care services*     | 6,154 $\pm$ 4,856                     | 2,790 $\pm$ 3,960                     | 2,510 $\pm$ 3,955                     | 2,274 $\pm$ 3,796                     | 1,994 $\pm$ 3,672                     | 12,554 $\pm$ 10,635                    |
| <b>All health care services</b> | <b>28,391 <math>\pm</math> 36,838</b> | <b>16,029 <math>\pm</math> 26,922</b> | <b>15,031 <math>\pm</math> 27,689</b> | <b>14,210 <math>\pm</math> 27,980</b> | <b>12,748 <math>\pm</math> 26,158</b> | <b>66,559 <math>\pm</math> 80,114</b>  |
| <b>Vertebral</b>                | <b>N=7,721</b>                        | <b>N=7,721</b>                        | <b>N=5,805</b>                        | <b>N=3,887</b>                        | <b>N=2,072</b>                        | <b>N=7,721</b>                         |
| CCRS, home care, LTC            | 11,990 $\pm$ 21,382                   | 9,373 $\pm$ 19,538                    | 9,139 $\pm$ 19,502                    | 8,376 $\pm$ 17,987                    | 7,620 $\pm$ 18,479                    | 34,495 $\pm$ 59,260                    |
| Hospitalization                 | 17,023 $\pm$ 31,607                   | 5,166 $\pm$ 16,827                    | 4,228 $\pm$ 13,048                    | 3,518 $\pm$ 11,453                    | 3,222 $\pm$ 12,100                    | 28,003 $\pm$ 42,901                    |
| Inpatient rehabilitation        | 2,616 $\pm$ 8,637                     | 583 $\pm$ 3,913                       | 518 $\pm$ 3,533                       | 403 $\pm$ 3,352                       | 483 $\pm$ 3,514                       | 3,921 $\pm$ 11,120                     |
| Prescription drugs              | 2,438 $\pm$ 3,598                     | 2,208 $\pm$ 3,700                     | 2,074 $\pm$ 5,314                     | 1,913 $\pm$ 6,444                     | 1,940 $\pm$ 14,994                    | 7,689 $\pm$ 17,741                     |
| Other health care services*     | 6,834 $\pm$ 5,946                     | 3,072 $\pm$ 4,310                     | 2,616 $\pm$ 4,026                     | 2,208 $\pm$ 3,882                     | 1,928 $\pm$ 3,666                     | 13,501 $\pm$ 11,457                    |
| <b>All health care services</b> | <b>40,900 <math>\pm</math> 47,837</b> | <b>20,401 <math>\pm</math> 31,970</b> | <b>18,575 <math>\pm</math> 29,668</b> | <b>16,418 <math>\pm</math> 27,786</b> | <b>15,193 <math>\pm</math> 31,425</b> | <b>87,609 <math>\pm</math> 93,841</b>  |
| <b>Wrist</b>                    | <b>N=17,859</b>                       | <b>N=17,859</b>                       | <b>N=13,585</b>                       | <b>N=9,069</b>                        | <b>N=5,032</b>                        | <b>N=17,859</b>                        |
| CCRS, home care, LTC            | 4,424 $\pm$ 12,335                    | 4,286 $\pm$ 12,905                    | 4,453 $\pm$ 13,146                    | 4,739 $\pm$ 13,542                    | 4,493 $\pm$ 13,355                    | 15,770 $\pm$ 40,706                    |

|                                   |                        |                        |                        |                        |                        |                          |
|-----------------------------------|------------------------|------------------------|------------------------|------------------------|------------------------|--------------------------|
| Hospitalization                   | 4,567 ± 13,905         | 2,898 ± 10,800         | 2,722 ± 10,098         | 2,761 ± 11,510         | 2,389 ± 10,529         | 11,611 ± 25,080          |
| Inpatient rehabilitation          | 586 ± 4,736            | 318 ± 2,906            | 313 ± 2,776            | 364 ± 3,217            | 277 ± 2,458            | 1,405 ± 6,810            |
| Prescription drugs                | 1,751 ± 5,298          | 1,737 ± 5,410          | 1,673 ± 3,415          | 1,569 ± 3,129          | 1,517 ± 3,332          | 5,985 ± 13,387           |
| Other health care services*       | 5,212 ± 3,997          | 2,516 ± 3,612          | 2,356 ± 3,423          | 2,232 ± 3,458          | 2,066 ± 3,454          | 11,236 ± 9,572           |
| <b>All health care services</b>   | <b>16,541 ± 25,687</b> | <b>11,755 ± 22,304</b> | <b>11,518 ± 21,587</b> | <b>11,666 ± 22,941</b> | <b>10,742 ± 21,772</b> | <b>46,008 ± 63,629</b>   |
| <b>Pelvis</b>                     | <b>N=8,328</b>         | <b>N=8,328</b>         | <b>N=6,210</b>         | <b>N=4,140</b>         | <b>N=2,242</b>         | <b>N=8,328</b>           |
| CCRS, home care, LTC              | 15,579 ± 23,450        | 10,153 ± 19,445        | 9,074 ± 18,396         | 8,385 ± 19,375         | 7,456 ± 17,769         | 38,674 ± 59,406          |
| Hospitalization                   | 16,651 ± 21,033        | 4,428 ± 13,724         | 3,542 ± 12,313         | 2,951 ± 12,933         | 2,476 ± 9,546          | 25,854 ± 32,665          |
| Inpatient rehabilitation          | 4,583 ± 9,851          | 532 ± 4,240            | 465 ± 3,554            | 394 ± 3,333            | 345 ± 2,764            | 5,750 ± 12,492           |
| Prescription drugs                | 2,263 ± 3,336          | 2,050 ± 3,551          | 1,804 ± 3,808          | 1,588 ± 3,686          | 1,436 ± 3,964          | 6,834 ± 10,936           |
| Other health care services*       | 6,274 ± 5,048          | 2,731 ± 3,927          | 2,262 ± 3,515          | 1,899 ± 3,442          | 1,673 ± 3,134          | 12,086 ± 10,160          |
| <b>All health care services</b>   | <b>45,350 ± 38,572</b> | <b>19,894 ± 29,339</b> | <b>17,146 ± 27,300</b> | <b>15,216 ± 28,400</b> | <b>13,388 ± 25,341</b> | <b>89,198 ± 82,653</b>   |
| <b>Femur</b>                      | <b>N=3,002</b>         | <b>N=3,002</b>         | <b>N=2,287</b>         | <b>N=1,551</b>         | <b>N=821</b>           | <b>N=3,002</b>           |
| CCRS, home care, LTC              | 21,965 ± 32,067        | 10,223 ± 20,914        | 8,857 ± 19,695         | 7,428 ± 18,139         | 6,718 ± 18,208         | 44,610 ± 69,827          |
| Hospitalization                   | 25,821 ± 35,846        | 4,479 ± 17,455         | 3,466 ± 11,853         | 3,231 ± 12,205         | 3,235 ± 13,720         | 35,494 ± 48,324          |
| Inpatient rehabilitation          | 5,316 ± 9,493          | 469 ± 3,244            | 385 ± 3,068            | 284 ± 2,556            | 225 ± 1,990            | 6,286 ± 11,195           |
| Prescription drugs                | 2,387 ± 5,160          | 2,197 ± 5,328          | 1,911 ± 3,614          | 1,833 ± 5,602          | 1,701 ± 6,324          | 7,451 ± 14,892           |
| Other health care services*       | 10,001 ± 5,858         | 2,760 ± 4,186          | 2,418 ± 3,894          | 2,103 ± 3,932          | 1,871 ± 3,774          | 16,202 ± 12,092          |
| <b>All health care services</b>   | <b>65,490 ± 54,116</b> | <b>20,127 ± 32,817</b> | <b>17,036 ± 27,931</b> | <b>14,879 ± 27,294</b> | <b>13,749 ± 29,294</b> | <b>110,043 ± 101,049</b> |
| <b>Clavicle, ribs and sternum</b> | <b>N=14,559</b>        | <b>N=14,559</b>        | <b>N=10,781</b>        | <b>N=7,086</b>         | <b>N=3,840</b>         | <b>N=14,559</b>          |
| CCRS, home care, LTC              | 7,304 ± 16,391         | 6,465 ± 15,385         | 6,079 ± 15,230         | 5,841 ± 14,818         | 5,236 ± 15,118         | 22,494 ± 45,200          |
| Hospitalization                   | 10,660 ± 22,608        | 4,781 ± 17,065         | 3,954 ± 17,104         | 3,398 ± 13,544         | 2,683 ± 9,538          | 20,730 ± 38,702          |
| Inpatient rehabilitation          | 1,246 ± 5,981          | 520 ± 4,160            | 386 ± 3,081            | 366 ± 3,324            | 374 ± 3,791            | 2,329 ± 8,870            |
| Prescription drugs                | 2,198 ± 4,199          | 2,042 ± 4,188          | 1,831 ± 3,866          | 1,651 ± 3,960          | 1,484 ± 3,955          | 6,791 ± 12,389           |
| Other health care services*       | 5,557 ± 5,352          | 3,090 ± 4,337          | 2,642 ± 3,937          | 2,310 ± 3,745          | 1,971 ± 3,316          | 12,248 ± 11,001          |

|                                 |                        |                        |                        |                        |                        |                        |
|---------------------------------|------------------------|------------------------|------------------------|------------------------|------------------------|------------------------|
| <b>All health care services</b> | <b>26,965 ± 36,737</b> | <b>16,898 ± 29,478</b> | <b>14,892 ± 28,336</b> | <b>13,566 ± 25,592</b> | <b>11,748 ± 23,412</b> | <b>64,593 ± 77,566</b> |
| <b>Radius and ulna</b>          | <b>N=4,828</b>         | <b>N=4,828</b>         | <b>N=3,655</b>         | <b>N=2,443</b>         | <b>N=1,274</b>         | <b>N=4,828</b>         |
| CCRS, home care, LTC            | 5,259 ± 13,266         | 4,663 ± 12,892         | 4,448 ± 11,989         | 4,323 ± 12,964         | 3,880 ± 11,673         | 16,501 ± 38,296        |
| Hospitalization                 | 6,628 ± 18,235         | 3,191 ± 11,357         | 3,238 ± 11,385         | 2,421 ± 9,128          | 2,320 ± 9,563          | 14,107 ± 27,927        |
| Inpatient rehabilitation        | 801 ± 4,926            | 334 ± 3,060            | 357 ± 2,909            | 276 ± 2,557            | 325 ± 2,755            | 1,631 ± 6,966          |
| Prescription drugs              | 1,896 ± 3,137          | 1,884 ± 3,889          | 1,830 ± 3,812          | 1,572 ± 2,692          | 1,512 ± 3,469          | 6,359 ± 10,608         |
| Other health care services*     | 5,671 ± 4,716          | 2,800 ± 3,800          | 2,601 ± 3,811          | 2,290 ± 3,491          | 2,131 ± 3,538          | 12,161 ± 10,535        |
| <b>All health care services</b> | <b>20,255 ± 29,462</b> | <b>12,871 ± 22,267</b> | <b>12,474 ± 22,188</b> | <b>10,883 ± 20,784</b> | <b>10,169 ± 20,235</b> | <b>50,759 ± 62,858</b> |
| <b>Tibia, fibula, knee</b>      | <b>N=10,894</b>        | <b>N=10,894</b>        | <b>N=8,213</b>         | <b>N=5,411</b>         | <b>N=3,018</b>         | <b>N=10,894</b>        |
| CCRS, home care, LTC            | 8,352 ± 20,131         | 5,317 ± 15,975         | 4,906 ± 14,355         | 4,844 ± 14,651         | 4,781 ± 15,577         | 21,098 ± 50,137        |
| Hospitalization                 | 9,159 ± 20,323         | 3,311 ± 10,904         | 3,295 ± 12,150         | 2,915 ± 11,712         | 2,737 ± 12,209         | 17,161 ± 31,104        |
| Inpatient rehabilitation        | 1,320 ± 5,589          | 318 ± 2,707            | 349 ± 3,437            | 300 ± 2,525            | 266 ± 2,639            | 2,125 ± 7,700          |
| Prescription drugs              | 1,978 ± 3,297          | 1,959 ± 3,926          | 1,902 ± 3,846          | 1,762 ± 3,145          | 1,596 ± 2,926          | 6,689 ± 11,242         |
| Other health care services*     | 5,866 ± 4,962          | 2,746 ± 3,898          | 2,582 ± 3,783          | 2,353 ± 3,659          | 2,149 ± 3,472          | 12,323 ± 10,831        |
| <b>All health care services</b> | <b>26,676 ± 37,569</b> | <b>13,652 ± 24,819</b> | <b>13,034 ± 24,400</b> | <b>12,173 ± 23,528</b> | <b>11,528 ± 24,321</b> | <b>59,395 ± 77,675</b> |
| <b>Multiple</b>                 | <b>N=3,735</b>         | <b>N=3,735</b>         | <b>N=2,781</b>         | <b>N=1,878</b>         | <b>N=987</b>           | <b>N=3,735</b>         |
| CCRS, home care, LTC            | 16,670 ± 26,645        | 9,637 ± 20,525         | 8,540 ± 19,004         | 7,113 ± 15,424         | 6,728 ± 16,632         | 38,020 ± 62,405        |
| Hospitalization                 | 21,033 ± 31,575        | 4,097 ± 12,652         | 3,119 ± 10,293         | 2,875 ± 10,150         | 2,121 ± 6,918          | 29,459 ± 38,936        |
| Inpatient rehabilitation        | 4,697 ± 10,794         | 418 ± 2,892            | 435 ± 3,243            | 273 ± 2,302            | 285 ± 2,479            | 5,652 ± 12,087         |
| Prescription drugs              | 2,164 ± 3,993          | 2,000 ± 3,704          | 1,776 ± 3,256          | 1,630 ± 4,631          | 1,365 ± 3,263          | 6,667 ± 10,911         |
| Other health care services*     | 8,517 ± 6,180          | 2,683 ± 3,912          | 2,188 ± 3,449          | 1,908 ± 3,299          | 1,641 ± 3,079          | 14,222 ± 10,953        |
| <b>All health care services</b> | <b>53,082 ± 50,422</b> | <b>18,835 ± 28,977</b> | <b>16,058 ± 26,364</b> | <b>13,800 ± 23,336</b> | <b>12,140 ± 23,357</b> | <b>94,020 ± 90,011</b> |
| <b>All fractures</b>            | <b>N=115,776</b>       | <b>N=115,776</b>       | <b>N=87,322</b>        | <b>N=58,228</b>        | <b>N=31,861</b>        | <b>N=115,776</b>       |
| CCRS, home care, LTC            | 12,221 ± 23,037        | 8,151 ± 18,360         | 7,396 ± 17,227         | 6,701 ± 16,458         | 5,959 ± 15,828         | 30,961 ± 57,074        |
| Hospitalization                 | 14,655 ± 24,636        | 3,907 ± 13,801         | 3,375 ± 12,759         | 2,944 ± 12,020         | 2,533 ± 10,975         | 23,285 ± 35,634        |
| Inpatient rehabilitation        | 3,213 ± 8,442          | 435 ± 3,454            | 399 ± 3,240            | 340 ± 3,016            | 313 ± 3,054            | 4,206 ± 10,530         |
| Prescription drugs              | 2,103 ± 3,925          | 1,959 ± 4,143          | 1,779 ± 3,762          | 1,582 ± 3,752          | 1,414 ± 4,993          | 6,588 ± 12,086         |



|                                 |                        |                        |                        |                        |                        |                        |
|---------------------------------|------------------------|------------------------|------------------------|------------------------|------------------------|------------------------|
| Other health care services*     | 6,898 ± 5,332          | 2,687 ± 3,929          | 2,351 ± 3,696          | 2,046 ± 3,516          | 1,794 ± 3,313          | 12,880 ± 10,535        |
| <b>All health care services</b> | <b>39,089 ± 43,272</b> | <b>17,139 ± 28,292</b> | <b>15,300 ± 26,655</b> | <b>13,613 ± 25,507</b> | <b>12,013 ± 24,489</b> | <b>77,921 ± 84,825</b> |

CCRS, Continuing Care Reporting System; LTC, Long-term care

\*Other health care services include emergency department visits, hospital outpatient clinic visits, physician billings, non-physician billings, and laboratory claims

**Online Resource Fig. 1 Study design**

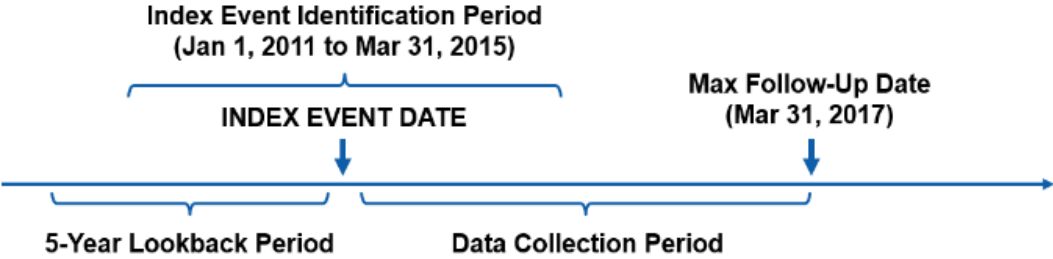

**Online Resource Fig. 2 Flow diagram of patients included in the different cohorts**

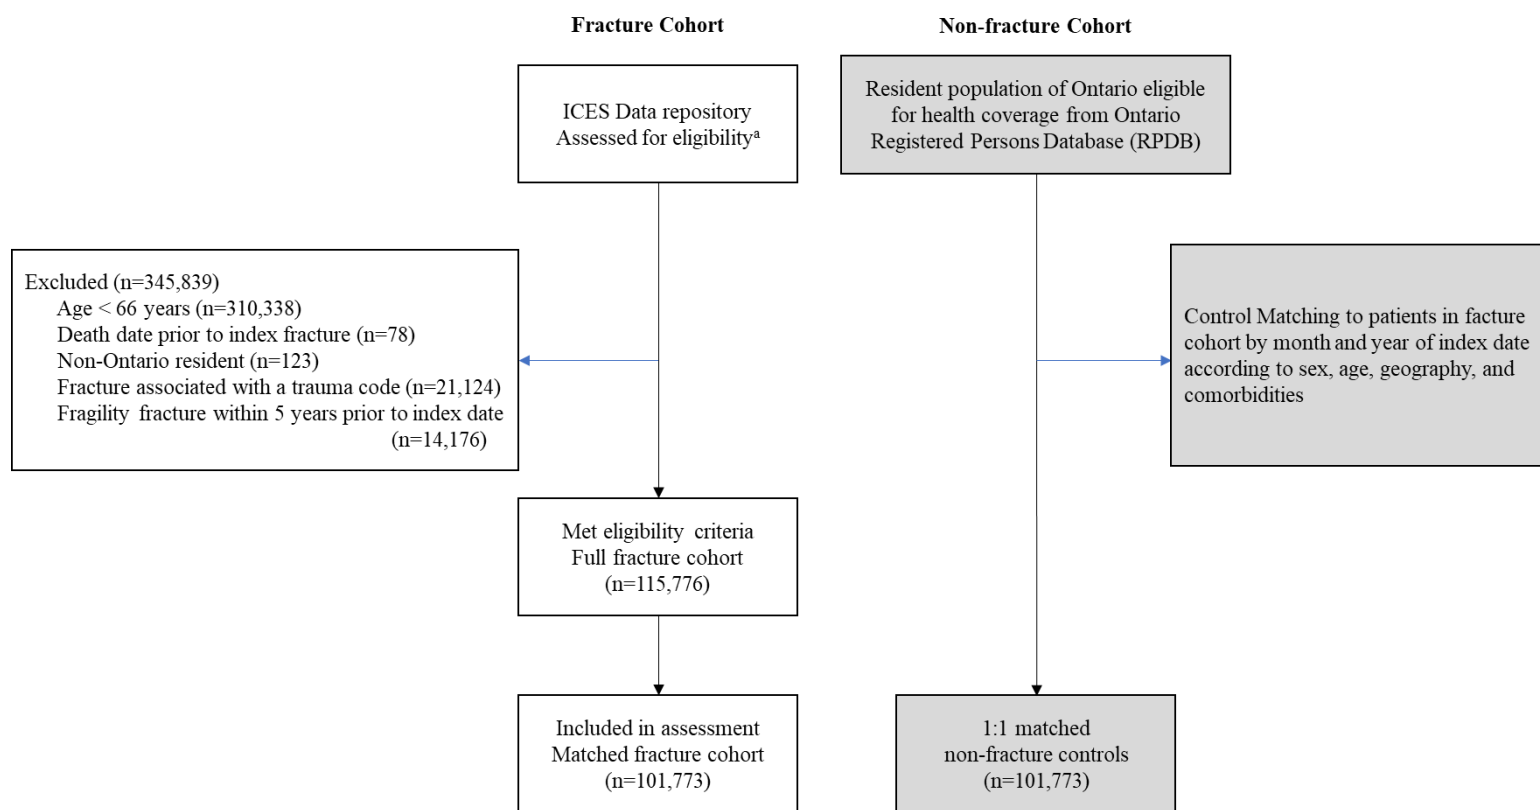

<sup>a</sup>All patients with valid ICES-specific key number (IKN) with a fracture occurring at an osteoporotic fracture site (hip, humerus, vertebral, wrist, pelvis, femur, clavicle/ribs/sternum, radius/ulna, or tibia/ fibula/knee) between January 1, 2011 and March 31, 2015. Fractures were identified using ICD-10-CA codes from hospital admissions, emergency room visits, and ambulatory care.

**Online Resource Fig. 3 Number of index fragility fractures per year (2011-2015\*), by site of fracture and year of fracture (full fracture cohort)**

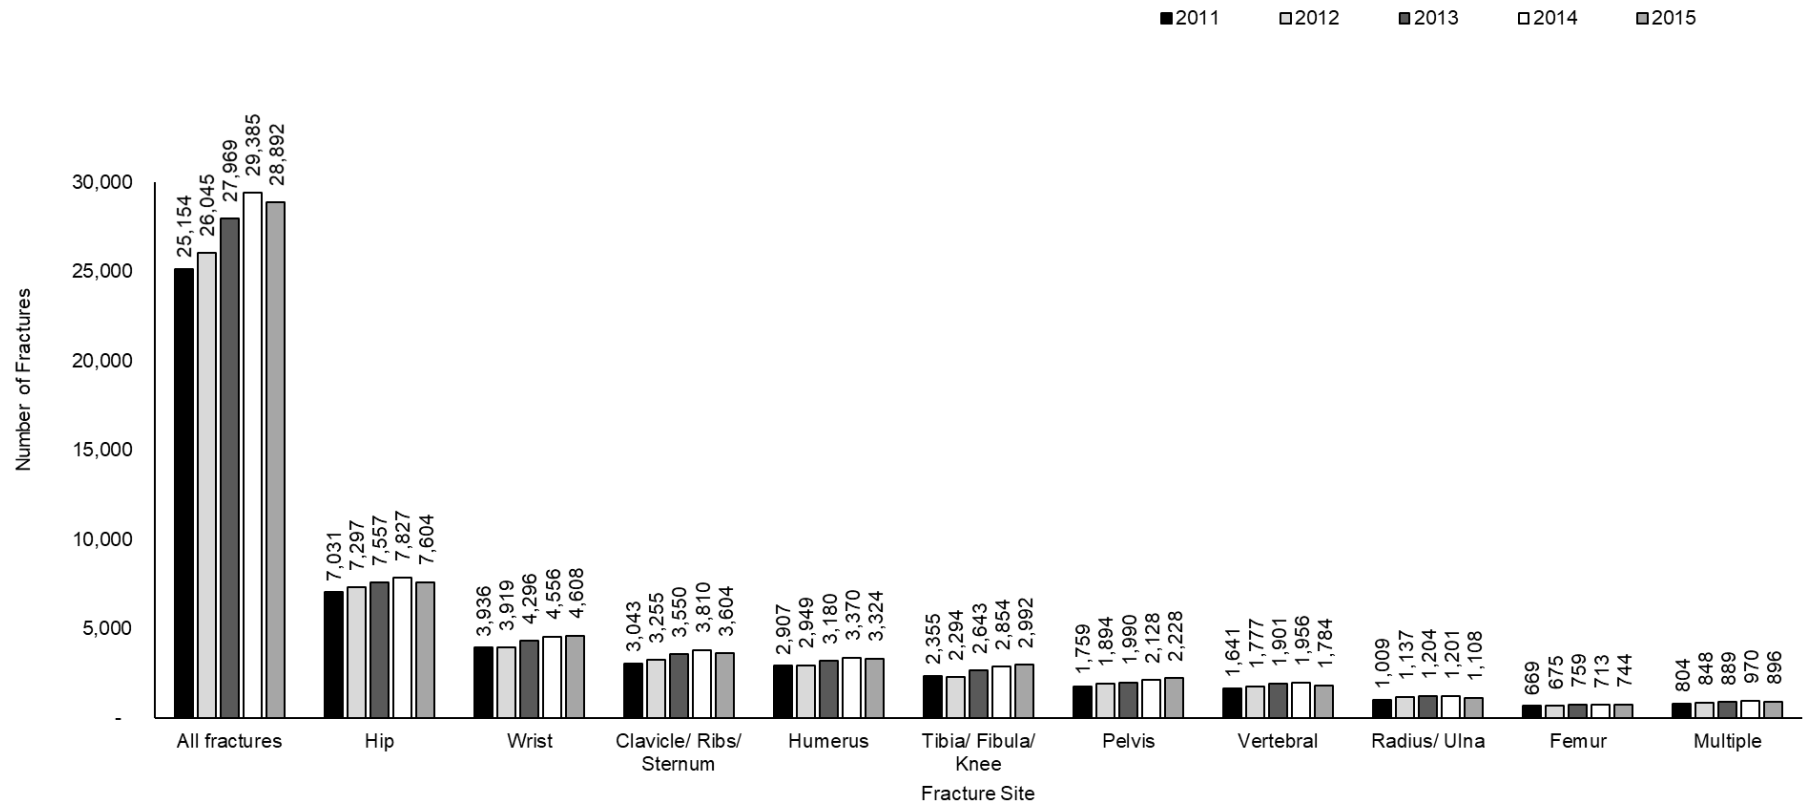

\*For 2015: Fractures were captured from January 1, 2015 to March 31, 2015, but were projected for the entire calendar year by multiplying by a factor of four

Online Resource Fig. 4 Mean annual cost per patient in 1<sup>st</sup> year post fracture, by age group (full fracture cohort)

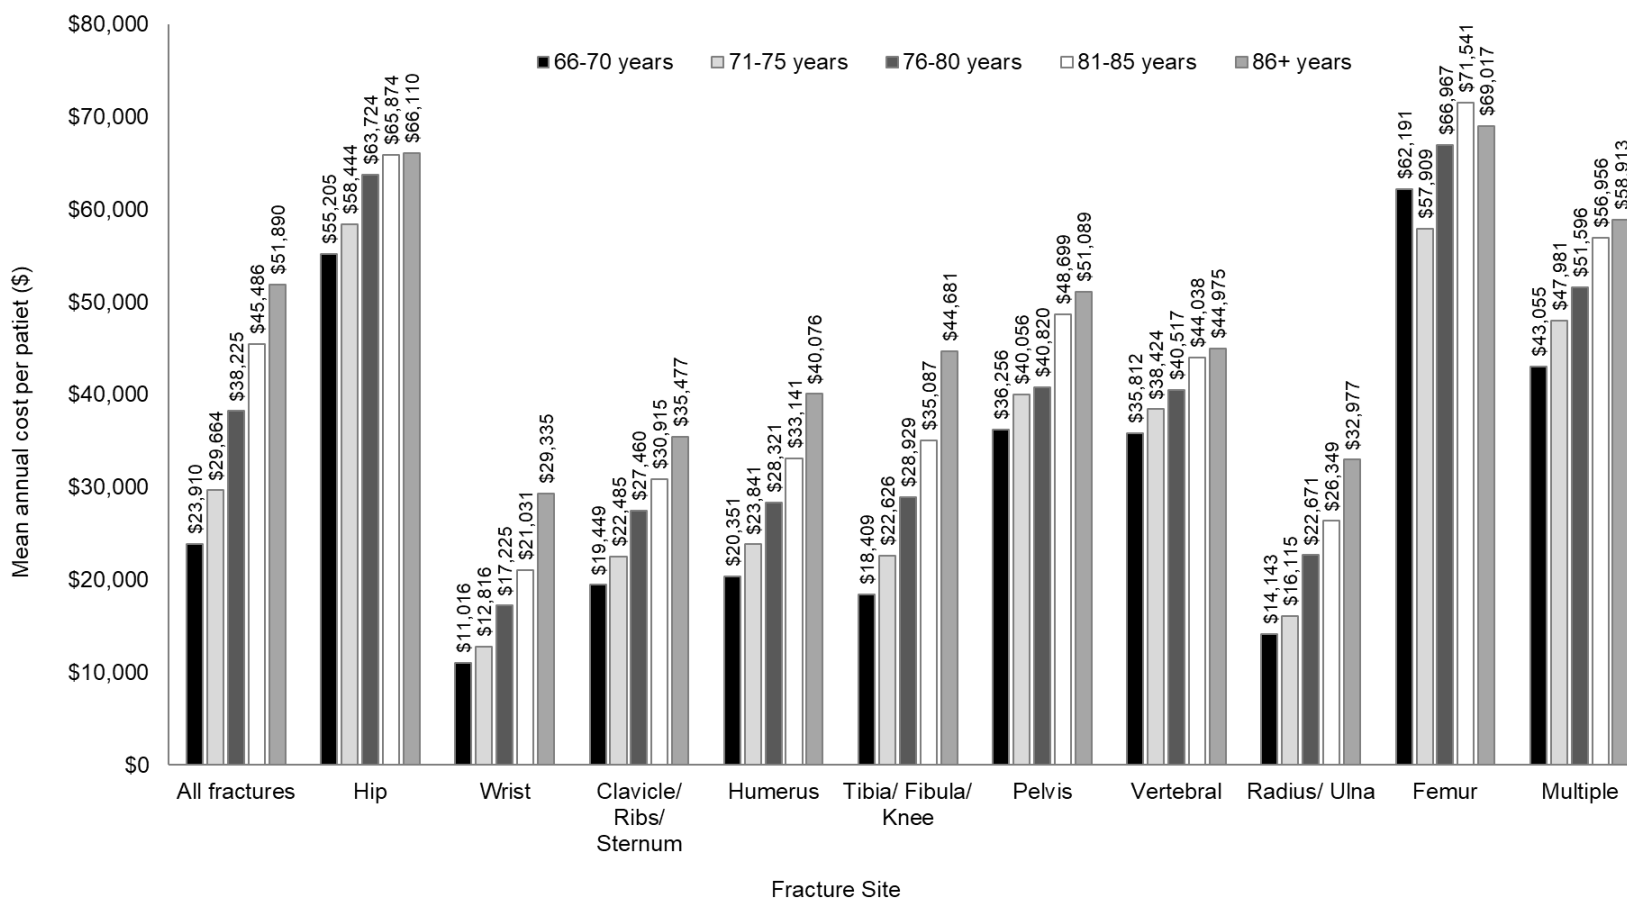

Online Resource Fig. 5 Mean annual cost per patient in 1<sup>st</sup> year post fracture, by number of comorbidities\* (full fracture cohort)

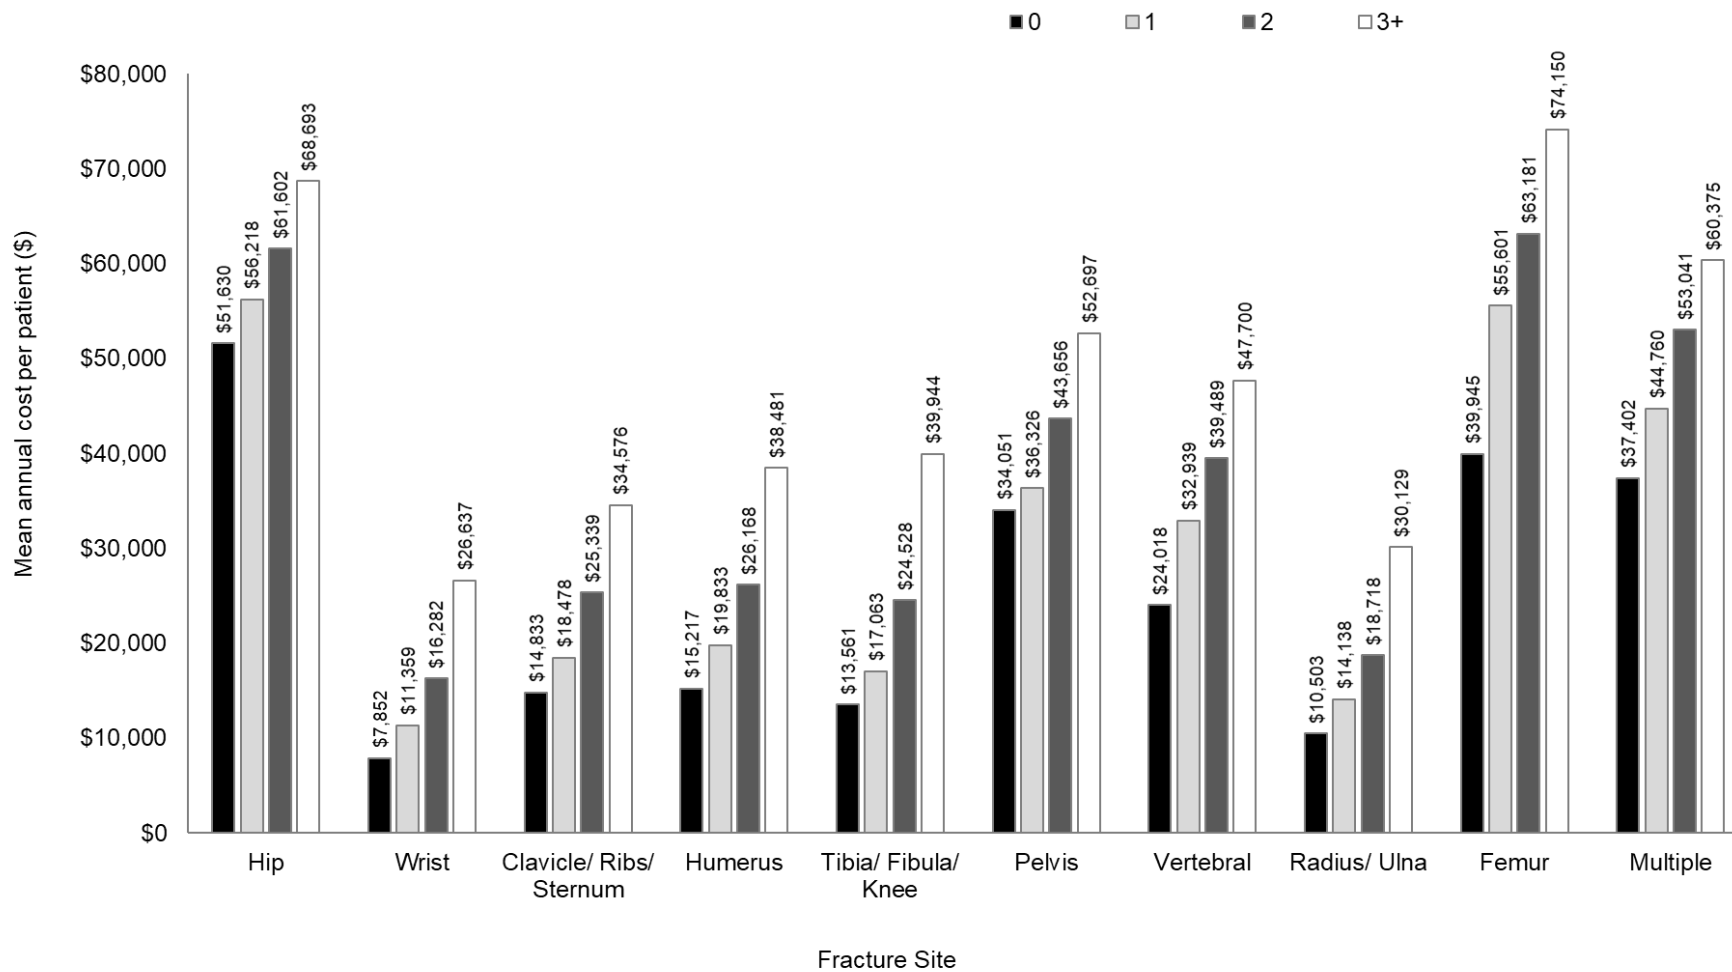

\*Comorbidities include cancer, osteoarthritis, asthma, COPD, rheumatoid arthritis, psoriasis, spondyloarthritis, chronic kidney disease, diabetes mellitus, myocardial infarction, stroke and dementia
